# Supplementary material for: Graphene based magnetic nanocomposites as versatile carriers for high yield immobilization and stabilization of β-galactosidase
Source: Royal Society of Chemistry journal article supplement (doi:10.1039/c6ra06960f), 2016-01-01
Supplement: c6ra06960f1.pdf [file c6ra06960f1.pdf]

**Table S1:** Immobilization of  $\beta$ -galactosidase on Gr@Fe<sub>3</sub>O<sub>4</sub> NCs after optimizing all conditions

| Enzyme:NCs<br>(mg) | Enzyme<br>activity<br>loaded, X,<br>(U) | Enzyme<br>activity in<br>washes, Y, (U) | Enzyme activity bound on Gr@Fe <sub>3</sub> O <sub>4</sub><br>NCs |                          | Immobilization<br>yield (%), B/A |
|--------------------|-----------------------------------------|-----------------------------------------|-------------------------------------------------------------------|--------------------------|----------------------------------|
|                    |                                         |                                         | Theoretical<br>(X-Y) = A                                          | Actual/Immobilized<br>=B |                                  |
| <b>10:100</b>      | 49.12                                   | 0.075                                   | 49.04                                                             | 43.84                    | 89.7                             |

Each value represents the mean for three independent experiments performed in duplicates, with average standard deviations,  $\leq 5\%$ .

**Table S2:** Kinetic parameters of free and bound  $\beta$ -galactosidase

|                                                     | $K_m$ (mM)      | $K_i$ (mM)      | $V_{max}$ ( $\mu$ moles/min/ml) |
|-----------------------------------------------------|-----------------|-----------------|---------------------------------|
| <b>Free <math>\beta</math>-galactosidase</b>        | 0.48 $\pm$ 0.13 | 1.27 $\pm$ 0.87 | 0.05 $\pm$ 0.003                |
| <b>Immobilized <math>\beta</math>-galactosidase</b> | 0.42 $\pm$ 0.07 | 3.33 $\pm$ 1.22 | 0.06 $\pm$ 0.005                |

Each value represents the mean of three independent experiments performed in duplicates, with average standard deviation of  $\leq 5\%$ .
